# Supplementary material
Source: publisher figshare collection journal article supplement (https://karger.figshare.com/ndownloader/files/35903330)
Supplement: Supplementary file 1 [file 35903330]

***Supplement to:***

***Should More Patients with Kidney Failure Bring Treatment Home? What We Have Learned from COVID-19***

Xueqing Yu, Vivekanand Jha, Hidetomo Nakamoto

**Supplementary figure**

**Fig. 1.** Schematic describing remote patient management approaches to supporting home dialysis, and the flow of information between patient/healthcare provider via supportive technology.

**
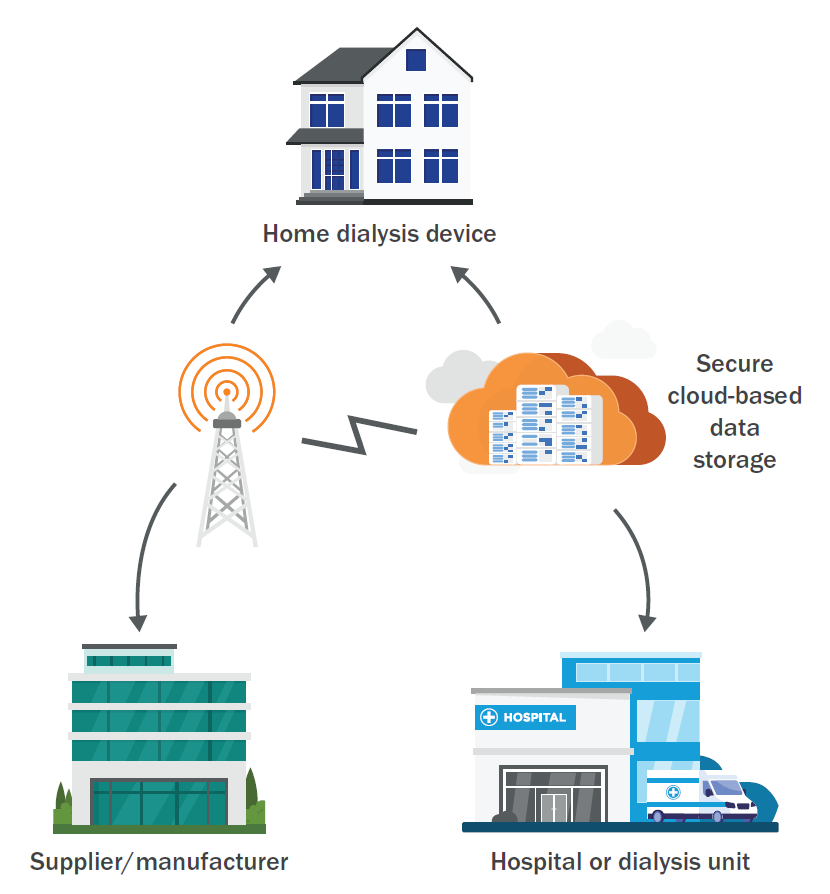
**
